# Supplementary material
Source: PubMed Central journal article supplement (PMC3776633)
Supplement: mt2013145x1.pdf [file mt2013145x1.pdf]

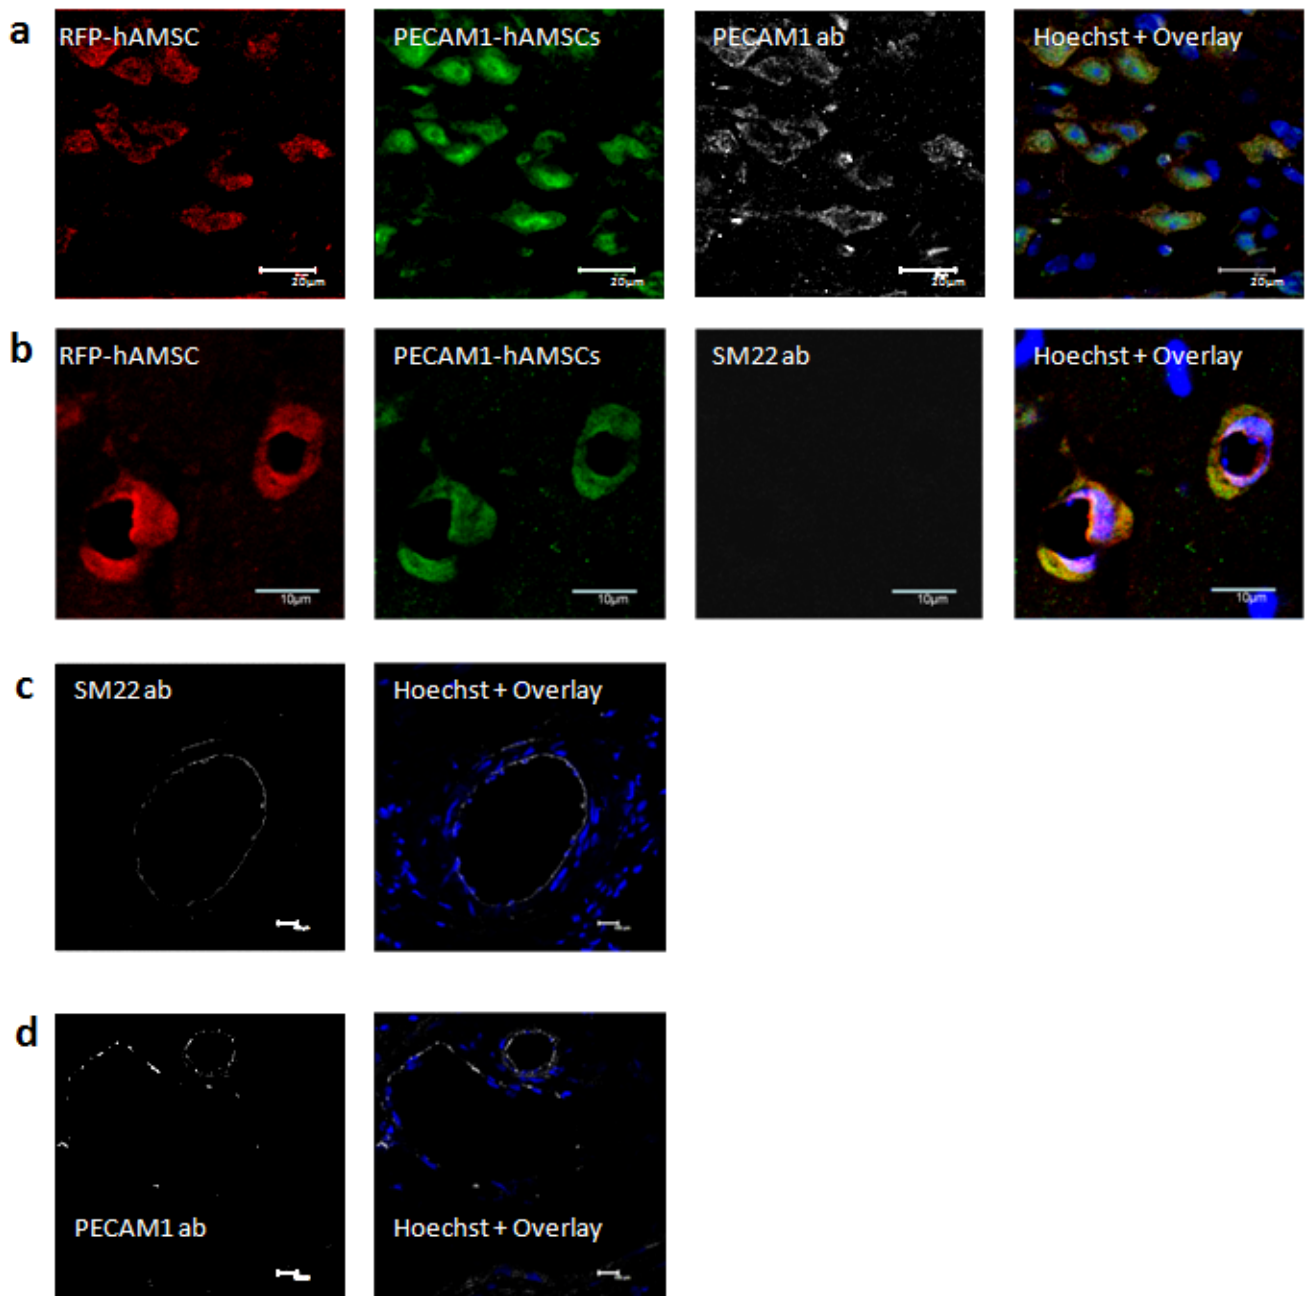

### Figure S1

Confocal microscopy analysis was performed on slices from brain tumors implanted with  $\Phi$ -PECAM:PL-G/RL-R-tTK-hAMSCs to determine co-expression of grafted cells with endothelial PECAM1 and pericytic SM22 markers. hAMSCs expressing CMV-promoter regulated RFP (red) and PECAM-promoter regulated eGFP (green) also labeled by an anti-human PECAM antibody (gray) (a) but did not express SM22 antibody (b). Control immunohistochemistry was performed on human myocardium tissue confirming both antibodies specificity (c,d).

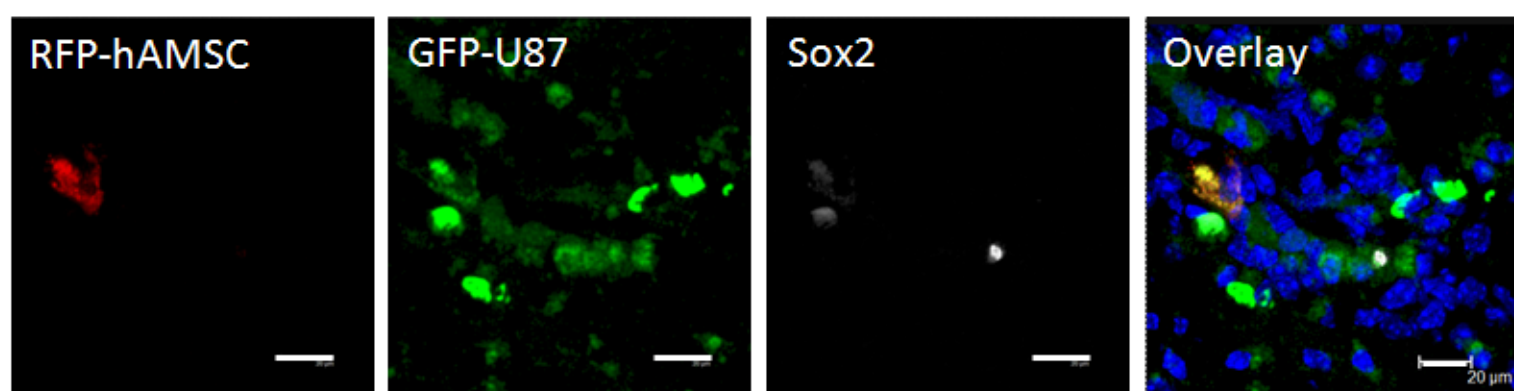

### Figure S2

Slices from brain tumors implanted with  $\Phi$ -RL-R-tTK-hAMSCs incubated with an anti human-Sox2 ab. Representative laser scanning confocal microscope images show hAMSCs (red fluorescent), U87 glioma cells (green fluorescent) and Sox2+ GSCs (grey). Hoechst nuclear stain in blue; Scale bar= 20  $\mu$ m.

**a****Multipotency**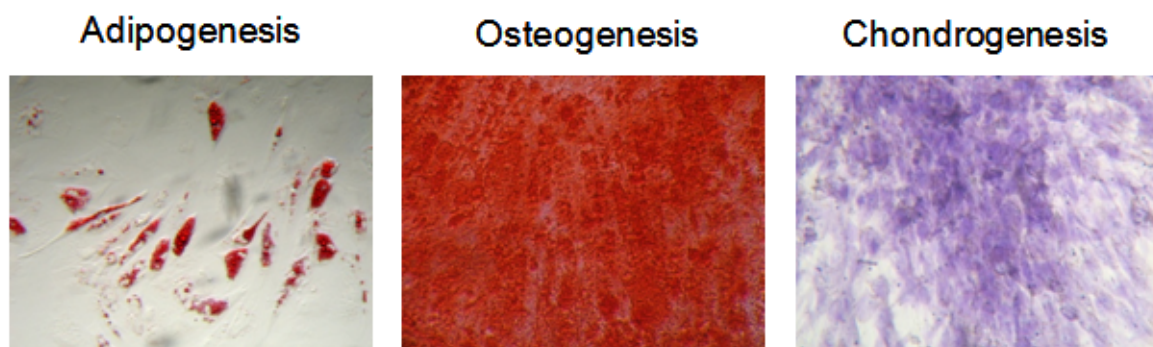**b**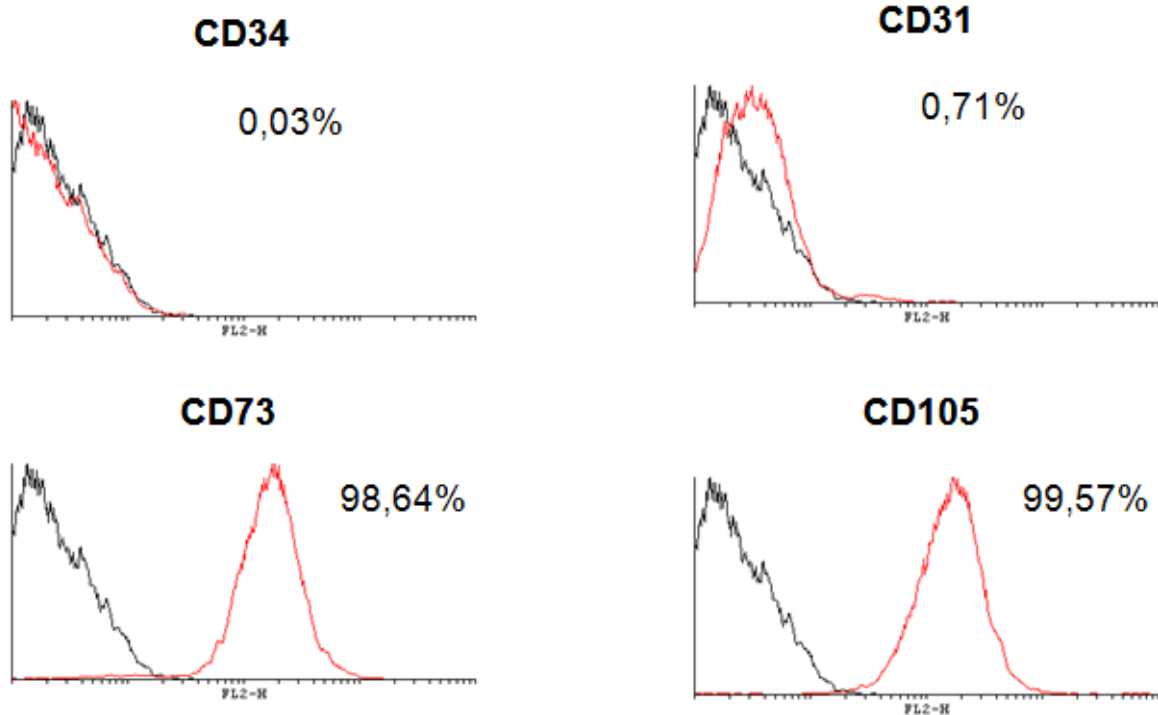**Figure S3**

Characterization of the human adipose tissue-derived MSC Multilineage differentiation capacity into adipogenic, chondrogenic and osteogenic lineages. Images show differentiated cell cultures following staining with, from left to right, Oil red O, Alizarin red S, and Alcian blue (a). Flow cytometry analysis of marker expression pattern, positive for CD73 and CD105, as well as negative for CD34 and CD31 (b).
